# Supplementary material for: Bioaugmentation with an aerobic denitrifying bacterium with quorum quenching activity for improved nitrogen removal and reduced membrane fouling in anoxic/oxic membrane bioreactor
Source: Royal Society of Chemistry journal article supplement (doi:10.1039/d2ra06676a), 2023-01-01
Supplement: d2ra06676a1.pdf [file d2ra06676a1.pdf]

## Supplementary material for

Bioaugmentation with an aerobic denitrifying bacterium with quorum quenching activity for improved nitrogen removal and reduced membrane fouling in anoxic/oxic membrane bioreactor

Pengyuan Wei <sup>a</sup>, Jun Li <sup>a,\*</sup>, Jing Zhang <sup>b</sup>, Yi Zhang <sup>a</sup>, Rong Luo <sup>a</sup>, Chaofan Xie <sup>a</sup>

*<sup>a</sup> National Engineering Laboratory for Advanced Municipal Wastewater Treatment and Reuse Technology, Engineering Research Center of Beijing, Beijing University of Technology, Beijing 100124, PR China*

*<sup>b</sup> Beijing city drainage Refco Group Ltd, Beijing 100124, PR China.*

*\* Corresponding author*

*E-mail address: ljbjut@126.com*

**Text S1. The composition of the synthetic wastewater**

The composition of the synthetic wastewater was as follows (/L): CH<sub>3</sub>COONa, 540 mg; NH<sub>4</sub>Cl, 160 mg; KH<sub>2</sub>PO<sub>4</sub>, 20.00 mg; NaHCO<sub>3</sub>, 300 mg; MgSO<sub>4</sub>, 15.63 mg; FeCl<sub>3</sub>, 0.075 mg; CaCl<sub>2</sub>, 2.45 mg; MnSO<sub>4</sub>, 1.8 mg.

## **Text S2.** Nitrogen mass balance

According to the nitrogen mass balance, nitrogen in the influent left the A/O-MBR in three main forms: (i) total nitrogen in the effluent; (ii) nitrogen carried by the residual sludge; and (iii) nitrogen converted to gaseous nitrogen by denitrification. Therefore, the nitrogen removed by denitrification could be calculated by the following equation:

$$M_{in, TN} = M_{out, TN} + M_{out, sludge} + M_{out, denitrification}$$

$$M_{in, TN} = Q_{in, wastewater} C_{in, TN}$$

$$M_{out, TN} = Q_{out, wastewater} C_{out, TN}$$

$$M_{out, sludge} = Q_{out, sludge} X_V f_N$$

where  $M_{in, TN}$ ,  $M_{out, TN}$ ,  $M_{out, sludge}$  and  $M_{out, denitrification}$  represent the total nitrogen in the influent water (kg/d), the total nitrogen in the effluent water (kg/d), the nitrogen contained in the discharged sludge (kg/d) and the nitrogen converted by denitrification (kg/d), respectively;  $Q_{in, wastewater}$ ,  $Q_{out, wastewater}$  and  $Q_{out, sludge}$  represent the influent flow (m<sup>3</sup>/d), effluent flow (m<sup>3</sup>/d) and discharged sludge volume (m<sup>3</sup>/d), respectively;  $C_{in, TN}$  and  $C_{out, TN}$  represent the influent total nitrogen concentration (kg/m<sup>3</sup>) and effluent total nitrogen concentration (kg/m<sup>3</sup>), respectively;  $X_V$  represents mixed liquor volatile activated sludge concentration (kg VSS/ m<sup>3</sup>);  $f_N$  represents the content nitrogen in activated sludge (kg N/kg VSS), which was usually taken as 0.1.

### **Text S3. Assessment of QQ activity of strain WZL728**

The method to determine the degradation ability of supernatant of strain WZL728 to various AHLs with long acyl chains was referred to Wei et al. [1]. In addition, the concentration of AHLs in the supernatant was determined by LC-MS as described in Section 2.2. The average degradation rate of AHLs in supernatant was calculated to determine the QQ activity of strain WZL728.

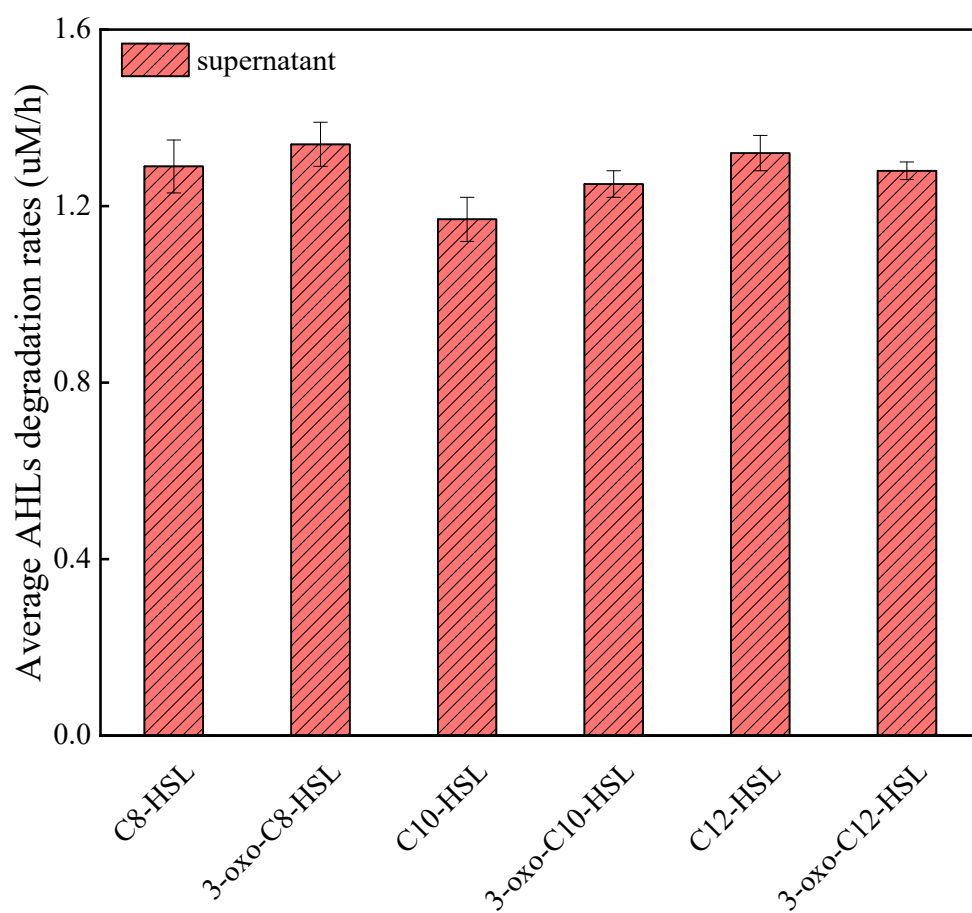

**Figure S1.** Average degradation rates of the supernatant of strain WZL728 for AHLs with long acyl chains

## Reference

1. Wei, P.Y.; Zhang, J.; Li, J.; Zheng, Z.M.; Wang, Z.Z.; Han, H.; Zhang, Y.; Luo, R.  
Isolation and identification of a novel aerobic denitrifying bacterium with quorum  
quenching activity and the effect of environmental factors on its performance.  
*Environ. Technol. Inno.* 2022, 28, 102913.
